# Supplementary material for: Development of a Fast Liquid Chromatography Coupled to Mass Spectrometry Method (LC-MS/MS) to Determine Fourteen Lipophilic Shellfish Toxins Based on Fused–Core Technology: In-House Validation
Source: MDPI journal article supplement (doi:10.3390/md19110603), 2021-10-24
Supplement: s1 [file s1]

## *Supplementary material*

### **Development of a fast liquid chromatography coupled to mass spectrometry method (LC-MS/MS) to determine fourteen lipophilic shellfish toxins based on fused-core technology: In-house validation**

Table S1. Precision results for the analysis of naturally contaminated samples

| Sample | Matrix | Toxin       | RSDr<br>% ( <i>n</i><br>= 2) | RSDR<br>% ( <i>n</i> =<br>5) |
|--------|--------|-------------|------------------------------|------------------------------|
| 502    | Mussel | Total<br>OA | <<br>LOQ                     | <<br>LOQ                     |
| 504    | Mussel | Total<br>OA | *                            | 7.9                          |
| 505    | Mussel | Total<br>OA | *                            | 6.90                         |
| 506    | Mussel | Total<br>OA | *                            | 7.3                          |
| 507    | Mussel | Total<br>OA | *                            | 7.0                          |
| 514    | Mussel | Total<br>OA | 2.7                          | 9.7                          |
| 515    | Mussel | Total<br>OA | 9.0                          | 11.6                         |
| 516    | Mussel | Total<br>OA | 1.7                          | 12.1                         |
| 517    | Mussel | Total<br>OA | 7.0                          | 10.8                         |
| 518    | Mussel | Total<br>OA | 6.1                          | 13.2                         |
| 519    | Mussel | Total<br>OA | 3.1                          | 12.6                         |
| 520    | Mussel | Total<br>OA | 5.8                          | <<br>LOQ                     |
| 521    | Mussel | Total<br>OA | 4.6                          | 14.4                         |
| 522    | Mussel | Total<br>OA | 2.4                          | <<br>LOQ                     |
| 639    | Cockle | Total<br>OA | 1.1                          | 22.3                         |

|      |        |             |     |        |
|------|--------|-------------|-----|--------|
| 646  | Mussel | Total<br>OA | 3.9 | 19.5   |
| 660  | Mussel | Total<br>OA | 1.4 | 17.2   |
| 688  | Mussel | Total<br>OA | 1.6 | 8.4    |
| 696  | Mussel | Total<br>OA | 3.4 | 8.7    |
| 698  | Mussel | Total<br>OA | 3.1 | 8.4    |
| 717  | Cockle | Total<br>OA | 3.4 | 14.8   |
| 1536 | Cockle | Total<br>OA | 3.2 | 9.6 ** |

---

\*Data missing

\*\*  $n = 7$
